# Supplementary material
Source: PubMed Central journal article supplement (PMC7149310)
Supplement: pnas.1911240117.sapp.pdf [file pnas.1911240117.sapp.pdf]

1  
2  
3  
4  
5  
6  
7  
8  
9  
10  
11  
12  
13  
14  
15  
16  
17  
18  
19  
20  
21  
22  
23  
24  
25  
26  
27  
28  
29  
30  
31  
32  
33  
34  
35  
36  
37  
38  
39  
40  
41

Supplementary Information for

## **Transcranial Magnetic Stimulation Induced Perturbations of Resting-State-Networks are Reproducible Markers of Causal Network Dynamics**

Recep A. Ozdemir<sup>1</sup>, Ehsan Tadayon<sup>1</sup>, Pierre Boucher<sup>1</sup>, Davide Momi<sup>1</sup>, Kelly A. Karakhanyan<sup>1</sup>, Michael D. Fox<sup>1,2</sup>, Mark Halko<sup>1</sup>, Alvaro Pascual-Leone<sup>\*1,3</sup>, Mouhsin M. Shafi<sup>\*1</sup>, Emiliano Santarnecchi<sup>\*1,4</sup>

Emiliano Santarnecchi  
Email: [esantarn@bidmc.harvard.edu](mailto:esantarn@bidmc.harvard.edu)

### **This PDF file includes:**

Supplementary methods and Results  
Figures S1 to S4  
Legends for Movies S1  
SI References

### **Other supplementary materials for this manuscript include the following:**

Movie SV\_1  
Movie SV\_2

1 **Supplementary Methods**

2

3 *Resting-state fMRI data and preprocessing*

4 Briefly, structural T1-weighted processing included surface reconstruction using  
5 Freesurfer, spatial normalization, brain extraction and tissue segmentation (white-matter,  
6 gray-matter and cerebrospinal fluid (CSF)). Functional data were slice time corrected and  
7 motion-corrected and registered to the T1-weighted structural MRI using boundary-based  
8 registration with six degrees of freedom. CompCor approach (with six temporal and six  
9 anatomical components) was deployed for physiological noise regressions, and the time  
10 series were bandpass filtered (0-008 - 0.08). The time-series were resampled onto  
11 fsaverage4 for creating individualized networks.

12

13 *Generating individual networks*

14 First, group-average functional networks are morphed into the subject's cortical  
15 surface using surface-based registration. Then, using the subject's preprocessed resting-  
16 state fMRI data, the vertices are re-assigned to one of the 18 networks in an iterative  
17 procedure based on the correlation between each vertex and the average time-course for  
18 each network while considering the variability of each network across subjects (i.e.  
19 confidence map). Networks #15-17 were combined to get DMN, and Networks #5 and #6  
20 were combined to get DAN (SI Appendix, Fig. S4).

21

22 *Sandia Matrices*

23 SM is a recently developed PC-based, matrix-like abstract reasoning task resembling  
24 and expanding the Raven's Matrices (Raven and Court, 1998). Compared to the original  
25 Raven stimuli, the SM tool includes multiple sets of validated stimuli which allow for  
26 repeated measurement of *gf*, while allowing for sensitive recording of response times  
27 (Santarnecchi et al., 2016, 2013). Each matrix is composed of a 3x3 grid, with each cell in  
28 the grid containing a set of shapes. A blank cell is present in position 3-3 of the grid  
29 (bottom right). Participants were required to complete the matrix using one of eight options.  
30 Participants responded by pressing the corresponding key on a keyboard (1-8). A maximum  
31 of 60 seconds was given for each matrix to be completed, after which the next matrix  
32 appeared. Two different sets of matrices were presented: Relational matrices (*gf* relational)  
33 and Logic matrices (*gf* logical). Relational matrices could be solved by capturing variations  
34 in the features of shapes across cells in the grid, (i.e., color, size, orientation, number,  
35 shape), with some features staying constant while others vary. Logic matrices required  
36 participants to perform logical operations across the matrix (i.e., conjunction, disjunction,  
37 or exclusive disjunction, known as AND, OR and XOR functions, respectively), similarly  
38 to the conditional inferences discussed above. Logic and relational matrices were presented  
39 in a randomized order, and the interstimulus interval was 5 seconds. Additionally, before  
40 starting the first block, participants performed a short training exercise to familiarize with  
41 the stimuli and reduce possible novelty effects in the first block. Before starting the training  
42 block, brief verbal instructions were given to participants explaining the task. Following

1 training participants completed 12 trials of both Relational and Logic matrices presented  
2 in a randomized order (24 matrices in total, with each matrix appearing for 60 sec),

3

#### 4 *TOPF*

5 The TOPF provided an estimate of premorbid intellectual abilities. Participants were  
6 requested to read aloud a total of 70 words, focusing on pronunciation. An estimated  
7 premorbid IQ score was calculated based on the number and type of errors. The test has  
8 been used in multiple cognitive studies (Alves et al., 2013) and clinical trials (Berg et al.,  
9 2016), providing a brief, validated estimate of IQ.

10

#### 11 *SRTT*

12 A visual cue was presented at four different positions, configured horizontally at the  
13 center of a computer screen. Subjects were asked to press the response button  
14 corresponding to the position of the visual cue as quickly as possible. The visual cues were  
15 presented either in a repeating sequence or in a random order. In the sequenced trials, the  
16 location of the stimulus followed a fixed order, while in random trials the stimuli were  
17 presented in random locations. When the task was finished, a questionnaire was fulfilled  
18 where participants were asked to indicate whether the visualization pattern was based on a  
19 repeated sequence or not. Subjects were unaware about the questionnaire before the task.

20

#### 21 *EMG Data Processing*

22 EMG data were amplified and digitized using a Powerlab 4/25T data acquisition  
23 system (ADInstruments) at a sampling rate of 4000 Hz (bandpass filtered at 10Hz to  
24 2000Hz). EMG signals were continuously streamed by using LabChart software (LabChart  
25 8.0) to monitor MEPs and epochs were recorded with a 150ms window length covering  
26 from 50 ms before to 100 ms after TMS pulse.

27

#### 28 *E-Field modeling*

29 The e-fields were simulated using SIMNIBS (v2.1) software. The head models  
30 were reconstructed using *mri2mesh* pipeline, which creates tetrahedral meshes consisting  
31 of white-matter (WM), gray-matter (GM), CSF, skull and scalp. We used the default  
32 conductivity values of 0.126 S/m for WM, 0.275 S/m for GM, 1.654 S/m for CSF, 0.01 S/m  
33 for the skull, and 0.465 S/m for scalp. We measured  $dI/dt$  from the Magventure Machine  
34 based on the stimulus intensity. The calculated E-fields were normalized by the maximum  
35 value of E-fields for each stimulation target. The normalized E-field maps were mapped to  
36 the fsaverage common template and averaged across subjects for visualization purposes.

37

#### 38 *EEG data Processing*

39 First, the two separate blocks of 60 trials were merged to create a single block of  
40 120 trials. The merged trials were then segmented into 3000ms epochs, each starting  
41 1000ms before (pre-stimulus) and ending 2000ms (post-stimulus) following TMS pulse,

1 respectively. Baseline correction was performed by subtracting the mean pre-stimulus (-  
2 900 to -100) signal amplitude from the rest of the epoch in each channel. Following  
3 baseline correction, data were visually inspected to identify extremely noisy channels with  
4 high amplitudes ( $3 \pm 2$  channels were deleted on average; range 0–6 out of 63. See Figure  
5 S1 step 3 for a sample). Zero-padding between -2ms and 14ms time range were then applied  
6 to remove the early TMS pulse artifact from the EEG data. All zero padded epochs were  
7 then tagged based on voltage ( $\geq 100 \mu\text{V}$ ), kurtosis ( $\geq 3$ ), and joint probability (Single  
8 channel-based threshold  $\geq 3.5\text{sd}$ ; All channel-based threshold  $\geq 5\text{sd}$ ) metrics to identify  
9 excessively noisy epochs. Visual inspection was performed on the tagged epochs for the  
10 final decision for the removal of noisy epochs ( $24 \pm 10$  epochs were deleted on average;  
11 range 2-44 out of 120; See Figure S1 steps 4 and 5 for a sample). Next, an initial round of  
12 fast independent component analysis (fICA) (43) was performed to exclusively identify  
13 and remove components with early TMS evoked high amplitude electrode and EMG  
14 artifacts ( $1 \pm 1$  components were removed; range 0-3 out of 60, See Figure S1 step 6 for a  
15 sample). Prior to the first round of fICA, the EEG data were reduced into 60 dimensions  
16 by using principal component analyses (PCA) to minimize overfitting and noise  
17 components. After the first round of fICA, the EEG data were interpolated for previously  
18 zero-padded time window around TMS pulse (-2ms to 14ms) using linear interpolation,  
19 band pass filtered using a forward-backward 4<sup>th</sup> order butterwoth filter from 1 to 100Hz,  
20 notch filtered between 57 and 63Hz, and referenced to global average (See Figure S1 step  
21 7 for a sample data set). Subsequently, the data were reduced into 57 dimensions using  
22 PCA, and a second round of fICA was run to manually remove all remaining artifact  
23 components<sup>4</sup> including eye movement/blink, muscle noise (EMG), single electrode noise,  
24 TMS evoked muscle, cardiac beats (EKG), as well as auditory evoked potentials ( $22 \pm 6$   
25 components were removed; range 18-28 out of 37, See Figure S1 step 8 for topography,  
26 time series and power spectrum of representative artifact components). In both rounds of  
27 fICA, a semi-automated artifact detection algorithm incorporated into the open source  
28 TMS-EEG Signal Analyzer (TESA v0.1.0-beta) extension for EEGLAB was used to  
29 classify and visually inspect components based on their frequency, activity power  
30 spectrum, amplitude, scalp topography, and time course (44)  
31 (<http://nigelrogasch.github.io/TESA/>). Finally, the data were low pass filtered with a 4<sup>th</sup>  
32 order Butterworth filter at 50Hz, and interpolated for missing/removed channels using  
33 spherical interpolation (See Figure S1 step 9 for a sample cleaned data set with topography  
34 of selected TMS evoked potentials).

35

### 36 *GMFP and LMFP*

37 Global cortical activation level following TMS of DMN and DAN was measured  
38 with Global Mean Field Power (GMFP) analyses on TEPs using the following equation.

39

$$40 \quad GMFP(t) = \sqrt{\left\{ \frac{\sum_i^k (V_i(t) - V_{mean(t)})^2}{K} \right\}}$$

41

1 Where  $V_i(t)$  is the voltage at electrode  $i$  at a certain point in time,  $V_{\text{mean}(t)}$  is the mean of  
2 instantaneous TEP across electrodes, and  $K$  is the number of electrodes. The GMFP can be  
3 used to measure the global brain response to TMS (Lehmann and Skrandies, 1980; Komssi  
4 et al, 2004). A Local Mean Field Power (LMFP) analysis was also performed to identify  
5 local changes in cortical excitability induced by TMS of DMN and DAN. Region of  
6 Interests (ROIs) were determined separately for each hemisphere from the selected  
7 channels over frontal (Right Frontal ‘RF’ electrodes: FC2, FC4, FC6, F2, F4, F6 and Left  
8 Frontal ‘RF’ electrodes: FC1, FC3, FC5, F1, F3, F5), motor (Right Motor ‘RM’ electrodes:  
9 C2, C4, C6 and Left Motor ‘LM’ electrodes: C1, C3, C5), parietal (Right Parietal ‘RP’  
10 electrodes: CP2, CP4, CP6, P2, P4, P6 and Left Parietal ‘LP’ electrodes: CP1, CP3, CP5,  
11 P1, P3, P5) and visual cortices (Right Visual ‘RV’ electrodes: PO4, PO8, O2 and Left  
12 Visual ‘LV’ electrodes: PO3, PO7, O1). LMFP was calculated as root-mean-square value  
13 of the ROI electrodes for each time point (Casarotto et al., 2013).

14 TEP time series were used to test reproducibility of TMS evoked global and local  
15 cortical responses in electrode space.

16

## 17 **Supplementary Results**

18 *DMN stimulation induces higher global cortical activation in the resting brain.*

19 GMFP time series for a representative subject, comparison of group mean GMFP  
20 time series with standard deviations for DMN and DAN stimulations, and individual sum  
21 of GMFP values, computed as the total amount of cortical activation from 0 to 400ms post  
22 TMS, with trend lines were provided in supplementary figure S2A<sub>1</sub>, S2A<sub>2</sub> and S2A<sub>3</sub>  
23 respectively. We first computed cluster-based permutation (permutation  $n=10000$ ) paired  
24 t-test statistics (Maris and Oostenveld, 2007) on GMFP time series at each time point from  
25 -200 to 400ms to compare temporal evolution in global cortical activation between DMN  
26 and DAN stimulation. Although DMN stimulation has higher values (Figure S2A<sub>2</sub>),  
27 cluster-based permutation pairwise comparisons did not reveal significant differences ( $p >$   
28 0.05) at any time point between DMN and DAN. However, pairwise comparison for  
29 individual sum of GMFP values showed that DMN stimulation resulted in increased global  
30 cortical excitability ( $p = 0.03$ ) within 400ms window following TMS, when compared to  
31 DAN stimulation (Figure S2A<sub>3</sub>), suggesting that, at the group level, total amount of global  
32 cortical activation was higher following DMN stimulation in the resting brain. Given high  
33 inter-individual variability in sum of GMFP values (See shaded regions in figure S2A<sub>2</sub>)  
34 and a recent study (Jannati et al., 2017) showing the BDNF polymorphism as potential  
35 confounder in TMS induced responses, we split our participants into two groups based on  
36 their BDNF polymorphism (Val66Met vs Val66Val), and compared their GMFP values  
37 both for DAN and DMN stimulation (Figure S2). Independent sample t-tests revealed no  
38 significant differences between groups ( $p > 0.05$ ). Additionally, we ran control analyses to  
39 further examine whether higher GMFP values following DMN stimulation is confounded  
40 with possible different muscle activation patterns across stimulation conditions due to more  
41 medial or lateral targeted brain regions. Given the proximity of DMN stimulation targets  
42 to scalp/neck muscles we carefully inspected the systematic presence of stronger muscle  
43 activations following DMN stimulation which might potentially startle the subjects and  
44 thus potentially induce saliency-related Event-Related-Potentials. An additional cycle of

1 ICA analyses was ran using all session-1 data sets for each participant, by systematically  
2 keeping the TMS induced muscle components while removing all other components from  
3 the data. Supplementary figure S3 below shows examples of TMS induced muscle  
4 components for a representative subject (and for both stimulation conditions) that were  
5 kept in the data. We then quantified the amplitude of TMS induced muscle responses with  
6 GMFP analyses (figure S3B). Analysis of time series (Figure S3B, left panel) and overall  
7 response (figure S3B, right panel) showed highly similar and non-significant differences  
8 between stimulation conditions ( $p > 0.05$ ), suggesting that there is no systematic presence  
9 of significantly stronger muscle responses during DMN stimulation.

10 Similar to GMFP time series analyses, permutation based pairwise comparisons for  
11 LMFP time series also failed to reveal significant differences at any time point for all ROIs  
12 ( $p > 0.05$ ), although the DMN time series were higher in general (Supplementary Figure  
13 S4B<sub>2</sub>). Pairwise comparisons for individual sum of LMFP values did not show any  
14 significant differences ( $p > 0.05$ ) between DMN and DAN stimulation for the total amount  
15 of local cortical activations at any ROIs (Figure S4B<sub>3</sub>).

#### 16 17 *Test re-test reliability of TEPs*

18 To test the reproducibility of TMS evoked cortical activation dynamics, we first  
19 generated grand mean TEP time series, computed as the mean time series of all  
20 participants, for each EEG channel across stimulation conditions (DMN vs DAN) and  
21 sessions (Session-1 vs Session-2) (Figure S6A shows TEPs for DAN and Figure S6B  
22 shows TEPs for DMN). We then computed the Pearson correlations across grand mean  
23 TEP time series at every 100ms windows from -100ms to 700ms after TMS. Topographical  
24 evolution of these correlations are provided in figure S6C for each 100ms window. Scalp  
25 map topographies for pre-stimulus window (-100 to 0ms) showed predominantly low  
26 negative correlations ( $r < 0.5$ ), in both stimulation condition across sessions. For the DAN  
27 stimulation while increased positive correlations were mainly observed over bilateral  
28 prefrontal and left medial parietal cortices ( $r$  range: 0.11-0.89) 100ms following TMS,  
29 highest positive correlations across DAN sessions were achieved between 101-200ms and  
30 201-300ms windows for the entire scalp ( $r$  range: 0.56-0.99), except electrodes over central  
31 parietal region close to stimulation site (CP1:  $r=0.29$ , and CPz:  $r=0.44$ ). Positive  
32 correlations notably diminished after 300ms and returned to pre-stimulus values 500-  
33 600ms following TMS. For the DMN stimulation positive correlations mainly rose  
34 bilaterally over temporal-parietal, visual, motor and pre-motor cortices in the first 100ms  
35 window ( $r$  range: 0.64-0.93) and peaked between 101-200ms and 201-300ms windows  
36 following TMS ( $r$  range: 0.79-0.99), except in temporal parietal electrodes that are closer  
37 to stimulation site (C6:  $r=0.37$ , and CP6:  $r=0.51$ ). Contrary to the DAN stimulation,  
38 positive correlations following DMN stimulation survived up to 600ms window especially  
39 over frontal cortices and returned to pre-stimulus values 600-700ms following TMS.  
40 Comparison of global cortical correlation values, computed as the grand mean of all scalp  
41 electrodes, between the DAN and DMN stimulation revealed significantly higher  
42 correlations for the DMN scalp maps at 301-400ms ( $p = 0.02$ ), 401-500ms ( $p = 0.03$ ) and  
43 501-600ms ( $p = 0.01$ ) windows, suggesting prolonged reproducibility in TEPs following  
44 DMN stimulation (Figure S6D).

1  
2  
3  
4  
5  
6

### Supplementary Figures

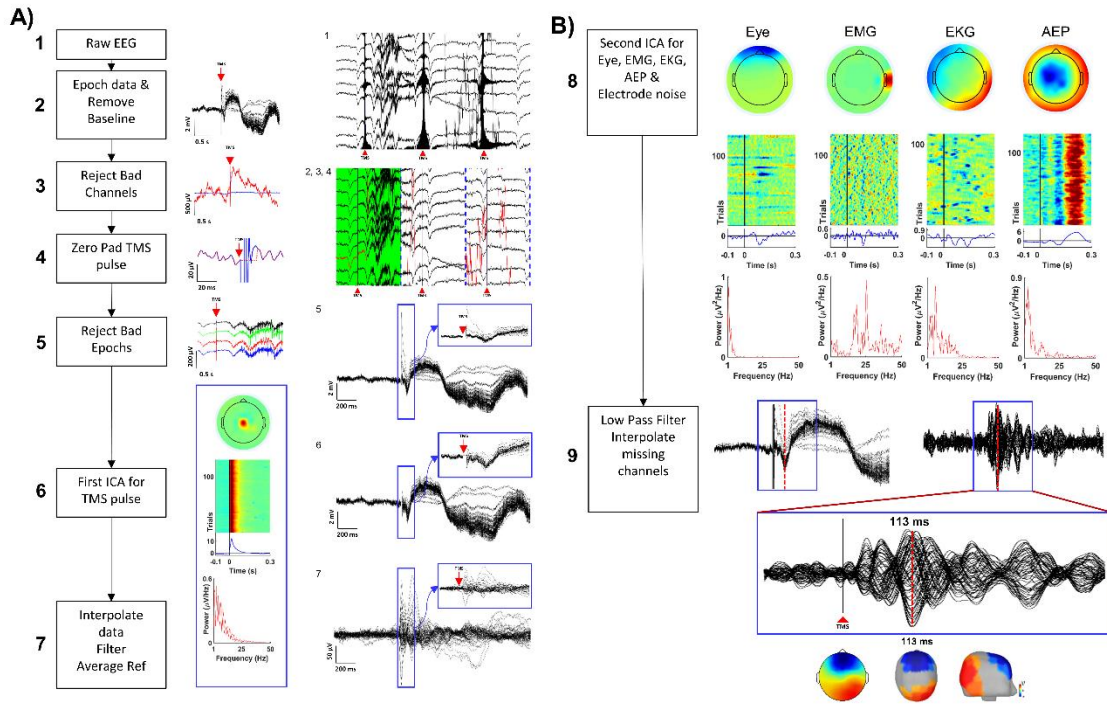

7  
8  
9  
10  
11  
12  
13  
14  
15  
16  
17  
18  
19  
20  
21  
22  
23  
24  
25  
26  
27  
28  
29

**Supplementary Figure 1.** EEG Signal Preprocessing: This supplementary figure shows major steps of EEG data cleaning procedures on a sample data set (panel A and B), and resulting signal transformation showing evolution of TMS evoked potentials (TEPs), with final scalp topography of a selected TMS evoked potential peak (Step 9). See methods for details.



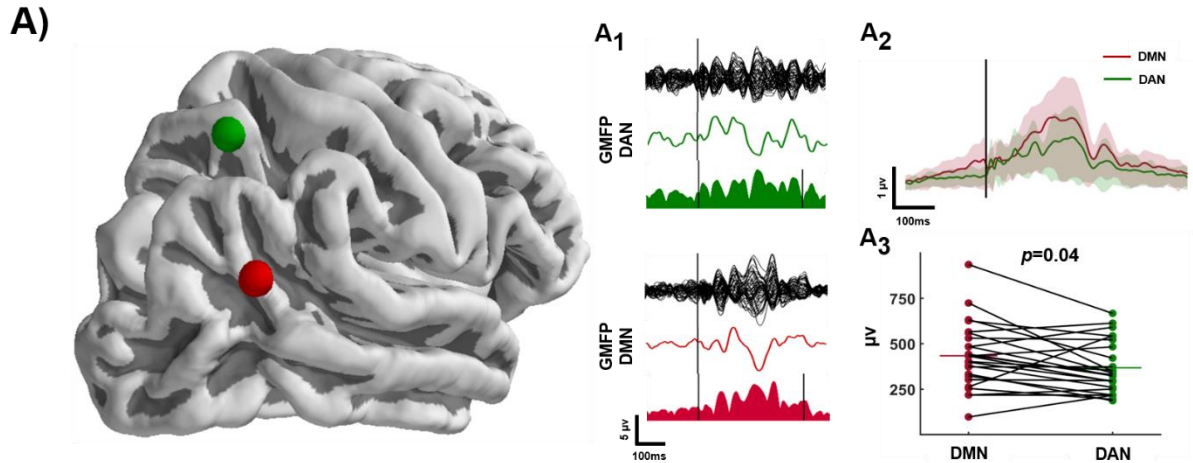

1  
2  
3  
4  
5  
6  
7  
8  
9  
10  
11  
12  
13  
14  
15  
16  
17  
18  
19  
20  
21  
22  
23  
24  
25  
26  
27  
28  
29  
30  
31  
32  
33  
34  
35

**Supplementary Figure 2.** TMS targets for DAN (green circle) and DMN (red circle) were shown in Panel A for a representative subject. TEPs (black lines representing each EEG electrode) and grand mean (solid colored lines) of all electrodes with resulting GMFP time series (colored areas under the integrated grand mean curves) were shown in Panel A<sub>1</sub>. Group means (solid lines) and standard deviations (shaded regions) of GMFP time series for each network stimulation were shown in panel A<sub>2</sub>. The area-under-the-curve of individual TMS evoked GMFPs (colored dots) and grand means (solid colored lines) of DAN and DMN stimulation along with between network comparison statistics were shown in Panel A<sub>3</sub> (Individual trends in TMS evoked GMFPs, as a function of network stimulation, were shown with solid black lines connecting each individual's GMFP values across stimulation conditions. Note that DMN stimulation induces significantly ( $p=0.04$ ) higher global electro-cortical activity at the group level, when compared to DAN stimulation).

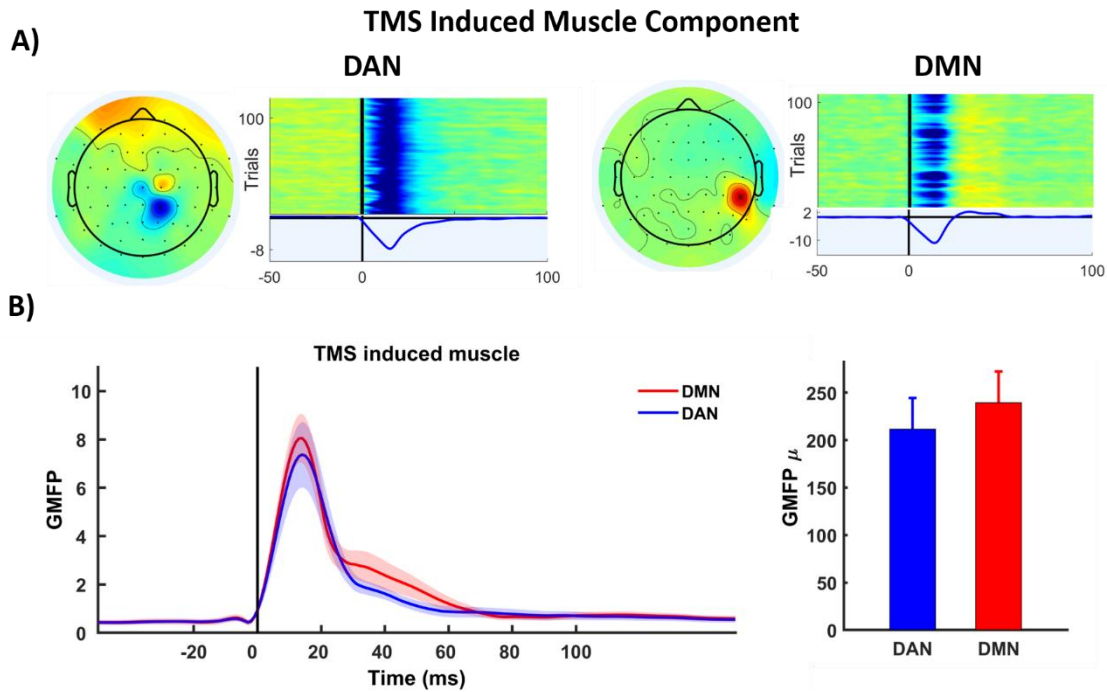

1  
2 **Supplementary Figure 3:** TMS induced muscle components. (A) Examples of TMS induced muscle  
3 components from a representative subject for both stimulation conditions (DAN: left panel, DMN: right  
4 panel). (B) Group averaged GMFP time series (left panel) for TMS induced muscle components (DAN: Blue  
5 solid line, DMN: red solid line with corresponding shaded regions representing standard error of mean), and  
6 sum of GMFP activity (right panel) for 100ms following TMS.

7  
8  
9  
10  
11



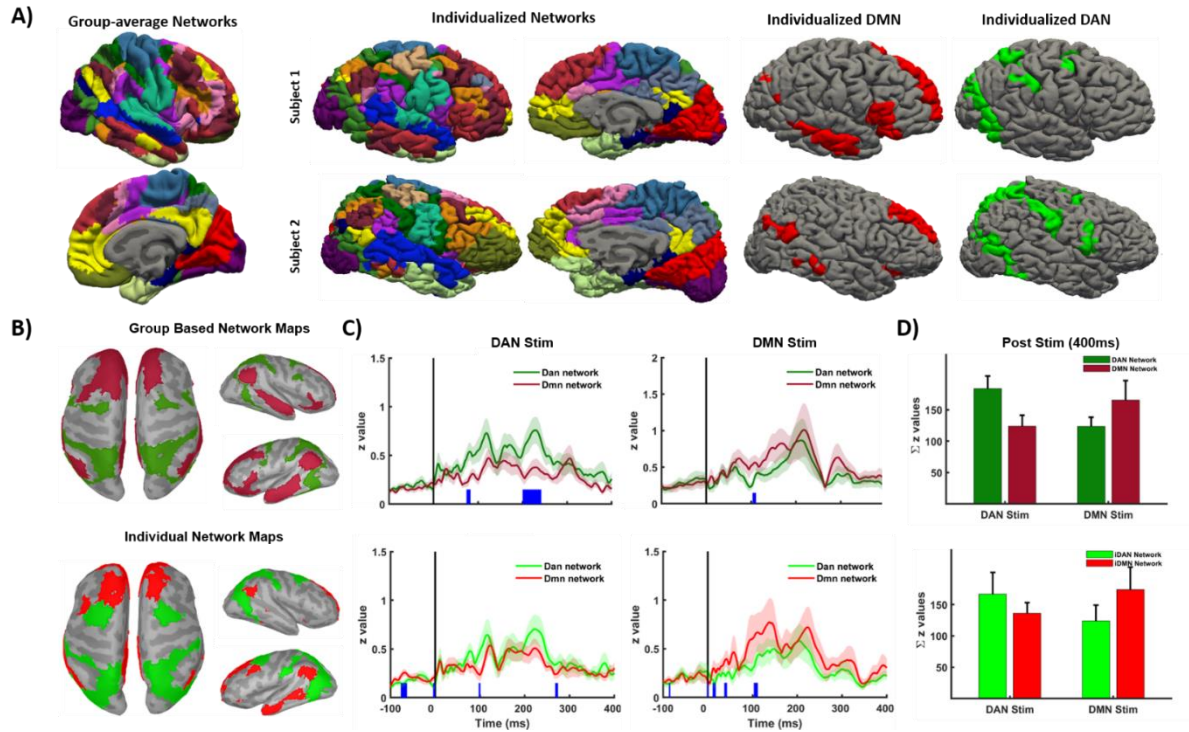

1  
 2 **Supplementary Figure 5. (A) Individualized Networks.** Group-average functional networks are morphed  
 3 into subject's anatomy and through an iterative process the vertices are assigned to the network that they  
 4 have the highest correlation with. The individualized networks as well as the individualized DMN and DAN  
 5 are shown for two representative subjects. (B) Group-based (upper panels) and individual network maps  
 6 (lower panels) on a common template. (C) Comparison of group averaged current density time series across  
 7 stimulation conditions extracted both from group-based (upper panel) and individual (lower panels) network  
 8 maps. (D) Sum of overall network activity 400ms following TMS across stimulation conditions.

9  
 10  
 11  
 12  
 13  
 14  
 15  
 16  
 17  
 18  
 19  
 20  
 21  
 22  
 23  
 24  
 25  
 26  
 27  
 28

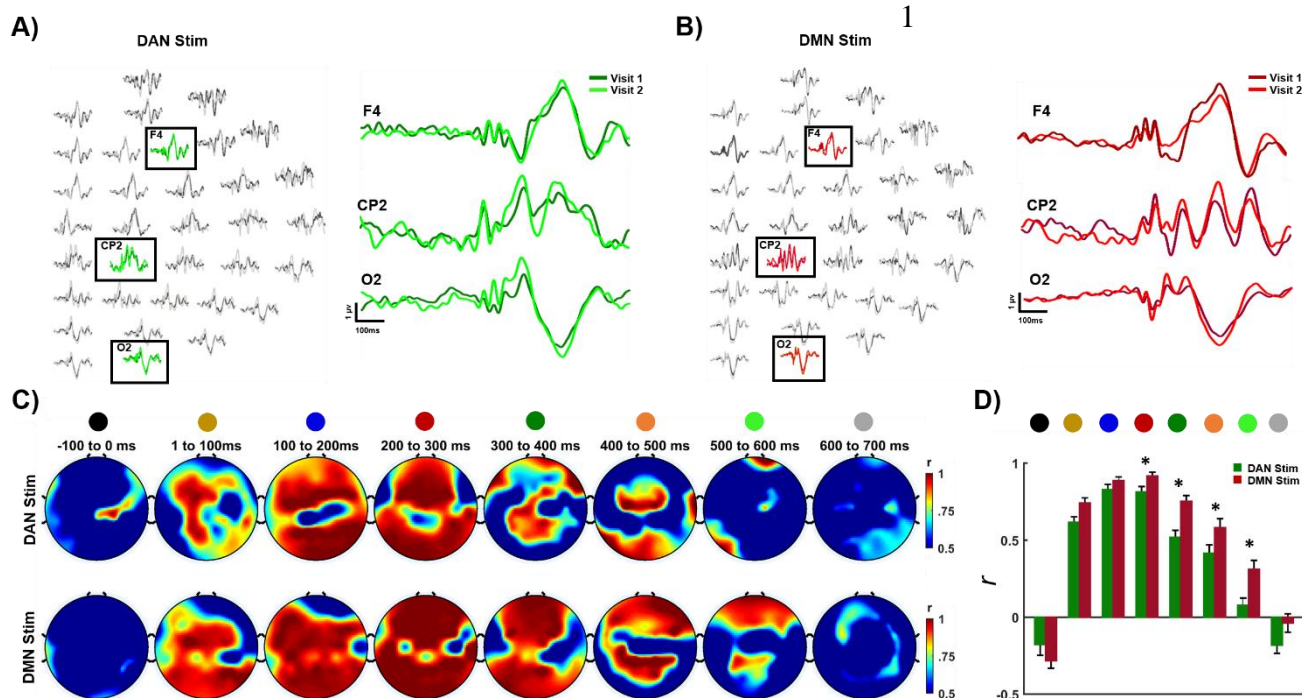

**Supplementary Figure 6:** Topographical similarity of TEPs between two identical TMS sessions (Reliability of TEPs): Grand mean TEP time series of EEG electrodes on the right (stimulated) hemisphere following DAN (panel A) and DMN (Panel B) stimulation across sessions (black solid lines show TEPs recorded in visit-1 while gray solid lines shows TEPs recorded in visit 2). Colored time series are expanded and presented on the right side of Panels A and B to show time course of representative channels from frontal (F4), parietal (CP2) and visual (O2) cortices across visits. Topography of test re-test correlations ( $r$  values of each EEG electrode) were shown in panel C both for DAN (upper scalp maps) and DMN (lower scalp maps) stimulation with 100ms moving windows before (-100 – 0ms) and after (1 to 700ms) TMS. Panel D show global mean of test re-test correlations at each time window (Color coded to match scalp maps shown in panel C), for DAN (green bars with standard errors) and DMN (red bars with standard errors).

2

3

4

5 **Movie SV\_1 (separate file).** Propagation of TMS induced brain activity within the DMN.

6

7 **Movie SV\_2 (separate file).** Propagation of TMS induced brain activity within the DAN.

8

9

10

11

12

13

14

15

16

1 **References**

- 2
- 3 1) Alves, L., Simões, M.R., Martins, C., Freitas, S., Santana, I., 2013. Premorbid IQ  
4 influence on screening tests' scores in healthy patients and patients with cognitive  
5 impairment. *J. Geriatr. Psychiatry Neurol.* 26, 117–126.
- 6 2) Berg, J.-L., Durant, J., Banks, S.J., Miller, J.B., 2016. Estimates of premorbid  
7 ability in a neurodegenerative disease clinic population: comparing the Test of  
8 Premorbid Functioning and the Wide Range Achievement Test. *Clin.  
9 Neuropsychol.* 30, 547–557.
- 10 3) Casarotto, S., Canali, P., Rosanova, M., Pigorini, A., Fecchio, M., Mariotti, M.,  
11 Lucca, A., Colombo, C., Benedetti, F., Massimini, M., 2013. Assessing the effects  
12 of electroconvulsive therapy on cortical excitability by means of transcranial  
13 magnetic stimulation and electroencephalography. *Brain Topogr.* 26, 326–337.
- 14 4) Jannati, A., Block, G., Oberman, L.M., Rotenberg, A., Pascual-Leone, A., 2017.  
15 Interindividual variability in response to continuous theta-burst stimulation in  
16 healthy adults. *Clin. Neurophysiol.* 128, 2268–2278.  
17 <https://doi.org/10.1016/j.clinph.2017.08.023>
- 18 5) Raven, J.C., Court, J.H., 1998. Raven's progressive matrices and vocabulary  
19 scales. Oxford psychologists Press.
- 20 6) Santarnecchi, Muller, T., Rossi, S., Sarkar, A., Polizzotto, N.R., Rossi, A., Cohen  
21 Kadosh, R., 2016. Individual differences and specificity of prefrontal gamma  
22 frequency-tACS on fluid intelligence capabilities. *Cortex* 75, 33–43.  
23 <https://doi.org/10.1016/j.cortex.2015.11.003>
- 24 7) Santarnecchi, Polizzotto, N.R., Godone, M., Giovannelli, F., Feurra, M., Matzen,  
25 L., Rossi, A., Rossi, S., 2013. Frequency-Dependent Enhancement of Fluid  
26 Intelligence Induced by Transcranial Oscillatory Potentials. *Curr. Biol.* 23, 1449–  
27 1453. <https://doi.org/10.1016/j.cub.2013.06.022>
- 28
